# Supplementary material for: Pyrolyzed egg yolk as an efficient bifunctional electrocatalyst for oxygen reduction and evolution reactions
Source: Royal Society of Chemistry journal article supplement (doi:10.1039/c5ra22066a), 2015-01-01

## Electronic Supporting Information

# Pyrolyzed Egg Yolk as an Efficient Bifunctional Electrocatalyst for Oxygen Reduction and Evolution Reactions

Zechao Shao<sup>†</sup>, Wen Zhang<sup>†</sup>, De An, Genlei Zhang and Yuxin Wang\*

State Key Laboratory of Chemical Engineering, Collaborative Innovation Center of Chemical Science and Engineering, Tianjin Key Laboratory of Membrane Science and Desalination Technology, School of Chemical Engineering and Technology, Tianjin University, Tianjin 300072, China.

<sup>†</sup> These authors contributed equally.

\* Corresponding Author, E-mail: yxwang@tju.edu.cn.

## Experimental Details

The morphology of pyrolyzed yolk was observed using scanning (SEM, S-4800, Hitachi) and transmission electron microscopy (TEM, JEM-2100F, JEOL). The crystal structures were analyzed using powder X-ray diffractometry (XRD, D8-Focus, Bruker AXS). The chemical compositions were measured via an X-ray energy-dispersive spectrometer (EDS, NORAN System 6, Thermo Scientific) and X-ray photoelectron spectroscopy (XPS, Versa Probe, PHI5000). The graphitic structures were studied by using a micro-Raman spectrometer (DXR, Thermo Scientific) with an incident wavelength of 532 nm.

The electrocatalytic activity towards ORR and OER was measured via an electrochemical workstation (PARSTAT 2273, Princeton) connected with a three-electrode cell, with a Pt sheet as counter electrode, a Ag/AgCl reference electrode and 0.1 M KOH solution as the electrolyte. A thin-film electrode (TFE) method was adopted to prepare the working electrode<sup>1</sup>. Typically, the catalyst ink, obtained by dispersing 5 mg of pyrolyzed yolk into a solution consisting 990  $\mu\text{L}$  of ethanol and 10  $\mu\text{L}$  of 5 wt.% Nafion solution, was applied to the surface of a polished glassy carbon disc and dried at room temperature to obtain a working electrode with a loading of 354  $\mu\text{g}$  catalyst $\cdot\text{cm}^{-2}$ . For comparison, TFE with commercial Pt/C catalyst (20 wt.% Pt/C, Johnson Matthey) was also prepared using the same procedure.

In ORR experiment, the TFE was first activated in  $\text{N}_2$ -saturated electrolyte via cyclic voltammetry (CV) between 0.2 V and -1.2 V (vs. Ag/AgCl). The ORR and OER performance was tested via linear sweep voltammetry (LSV) in  $\text{O}_2$  and/or  $\text{N}_2$  saturated electrolyte with a scan rate of 10  $\text{mV}\cdot\text{s}^{-2}$ . The catalytic stability under OER condition was tested using chronoamperometry at the potential corresponding to a current density of 10  $\text{mA}\cdot\text{cm}^{-2}$  at the start.

## References

- 1 R. Kou, Y. Shao, D. Wang, M. H. Engelhard, J. H. Kwak, J. Wang, V. V. Viswanathan, C. Wang, Y. Lin, Y. Wang, *Electrochem. Commun.* 2009, 11, 954.

**Figure S1.** HR-TEM images of Yolk-800.

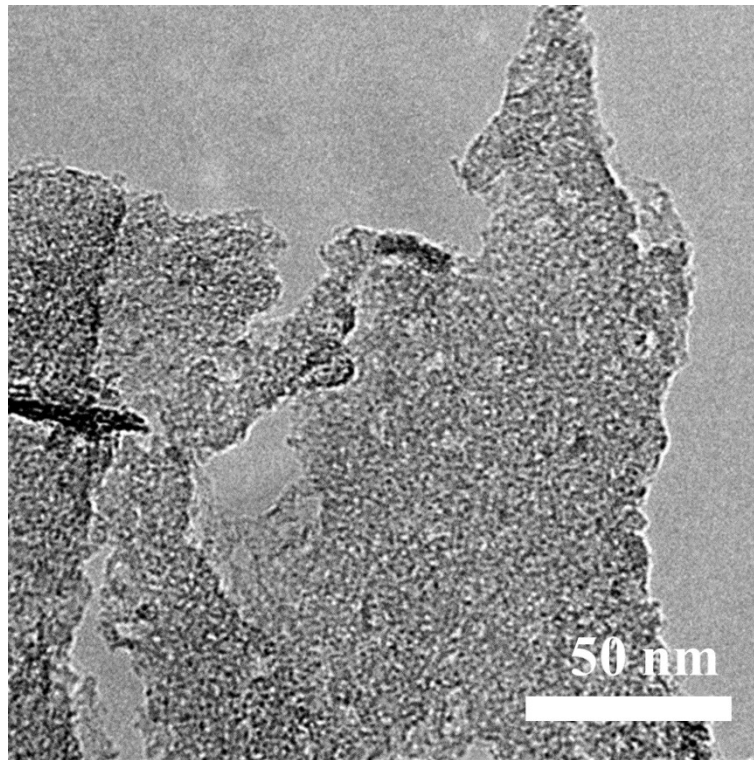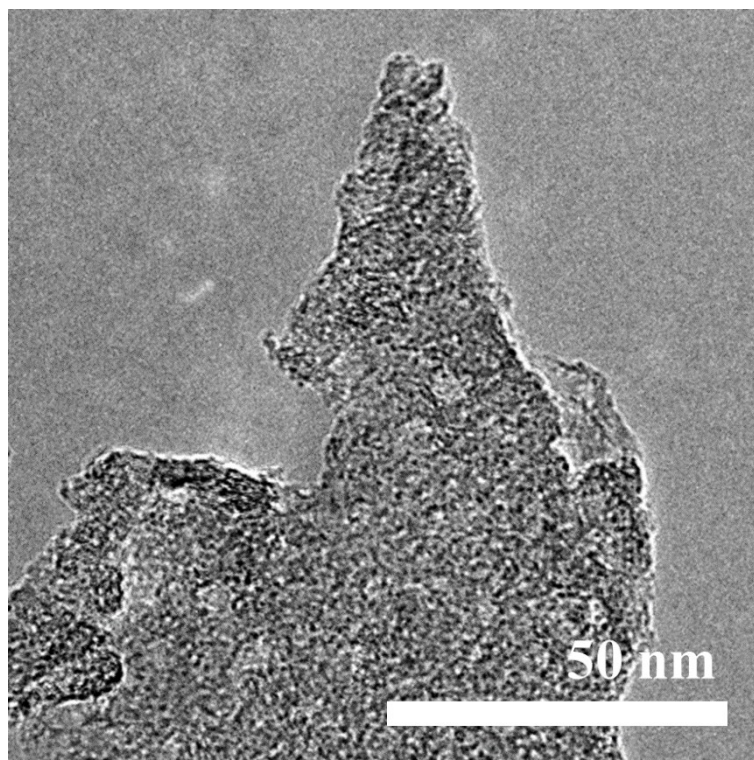

**Figure S2.** EDS spectra of the catalysts.

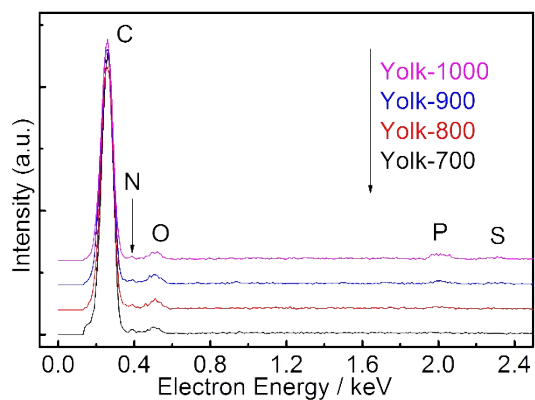

**Figure S3.** Deconvoluted Raman spectra of Yolk-700 (a), Yolk-900 (b), and Yolk-1000 (c), respectively.

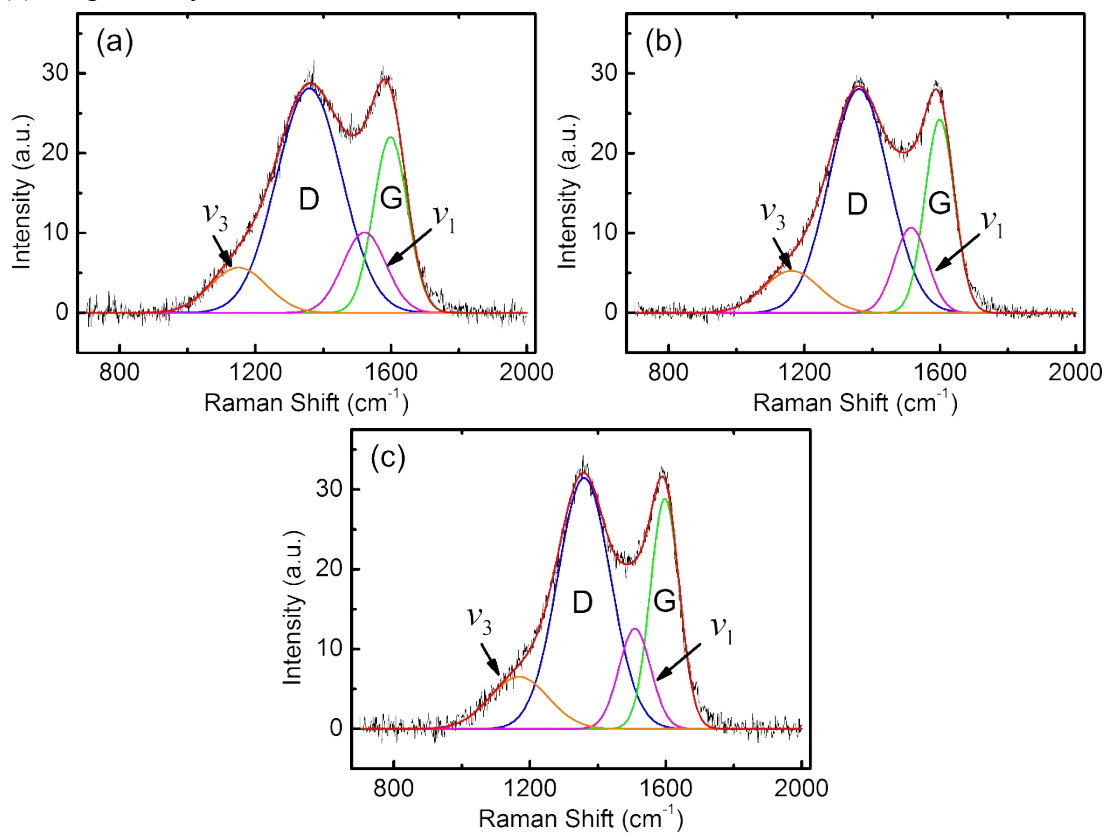

**Figure S4.** Deconvoluted N1s peaks in XPS spectra of Yolk-700 (a), Yolk-900 (b), and Yolk-1000 (c), respectively.

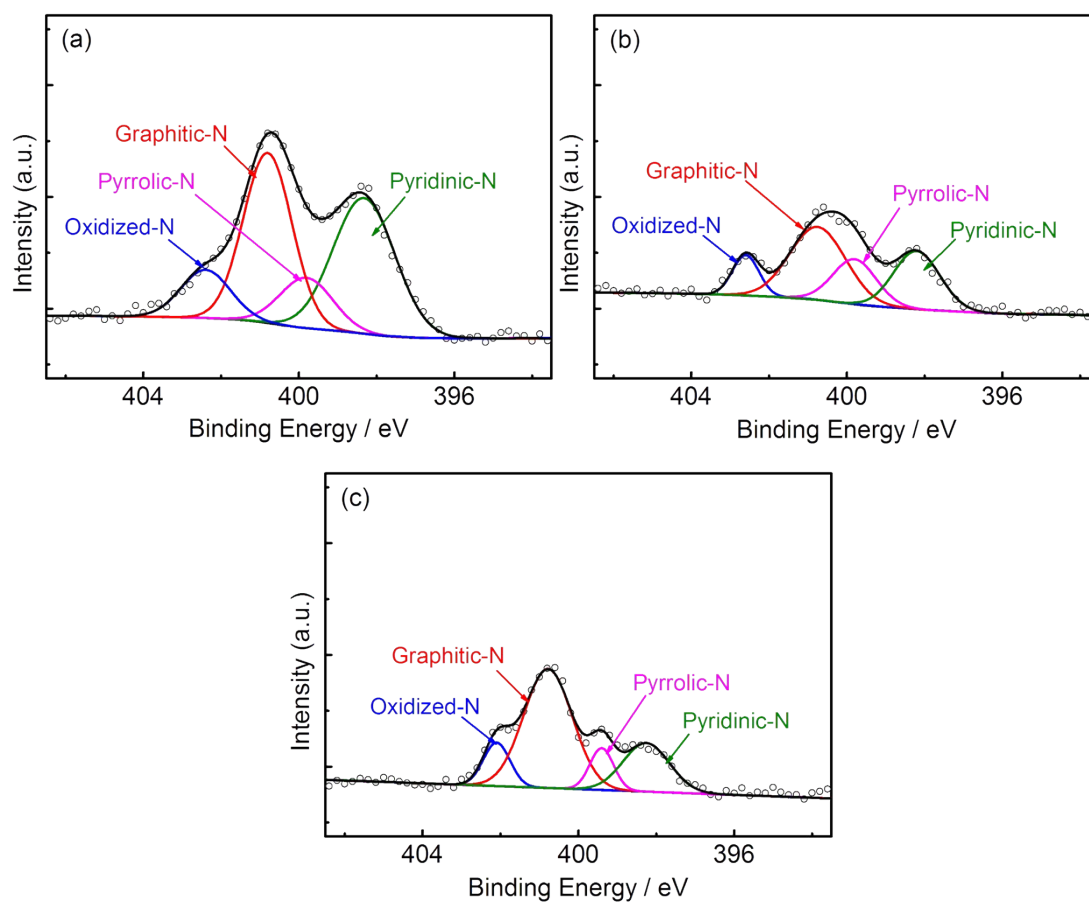

Supplement: c5ra22066a1.pdf [file c5ra22066a1.pdf]
